14 **Abstract**

15 Due to advancements in sensor-based, non-destructive phenotyping platforms, researchers are  
16 increasingly collecting data with higher temporal resolution. These phenotypes collected over  
17 several time points are cataloged as longitudinal traits and used for genome-wide association  
18 studies (GWAS). Longitudinal GWAS typically yield a large number of output files, posing a  
19 significant challenge for data interpretation and visualization. Efficient, dynamic, and integrative  
20 data visualization tools are essential for the interpretation of longitudinal GWAS results for  
21 biologists but are not widely available to the community. We have developed a flexible and user-  
22 friendly Shiny-based online application, ShinyAIM, to dynamically view and interpret temporal  
23 GWAS results. The main features of the application include (i) an interactive Manhattan plots for  
24 single time points, (ii) a grid plot to view Manhattan plots for all time points simultaneously, (iii)  
25 dynamic scatter plots for p-value-filtered selected markers to investigate co-localized genomic  
26 regions across time points, (iv) and interactive phenotypic data visualization to capture variation  
27 and trends in phenotypes. The application is written entirely in the R language and can be used  
28 with limited programming experience. ShinyAIM is deployed online as a Shiny web server  
29 application at <https://chikudaisei.shinyapps.io/shinyaim/>, enabling easy access for users without  
30 installation. The application can also be launched on the local machine in RStudio.

31 **Keywords**

32 ShinyAIM, Longitudinal traits, GWAS, Interactive visualization

## 33 **Introduction**

34 Due to the increased availability of high-throughput phenotyping platforms, there is growing  
35 interest in the quantitative genetics of longitudinally measured traits, i.e., traits that are measured  
36 over multiple time points by advanced imaging systems (Araus and Kefauver 2018; Araus et al.  
37 2018). For example, the application of GWAS to abiotic stress responses, such as drought,  
38 salinity, and temperature stress, measured at temporal resolution may provide insights into the  
39 mechanisms underlying plant physiological processes measured throughout the duration of stress  
40 or development (Busemeyer et al., 2013; Moore et al., 2013; Topp et al., 2013; Slovak et al.,  
41 2014; Wu□rschum et al., 2014; Yang et al., 2014; Bac-Molenaar et al., 2015; Campbell et al  
42 2015; Campbell, Walia, and Morota 2018).

43 Data visualization is a fundamental aspect of big data analysis in genetics. Manhattan plots are  
44 standard tools used to visualize GWAS results and to identify the genomic regions associated  
45 with a given phenotype. However, the static nature of these plots limits the information that can  
46 be displayed and extracted. Further, the number of Manhattan plots that can be viewed at one  
47 time is limited, making comparisons across phenotypes tedious. The situation becomes more  
48 challenging in the case of longitudinal GWAS, which are performed across multiple time points,  
49 with each time point producing a Manhattan plot. Furthermore, it is difficult to share GWAS  
50 outputs in an easy and convenient way, requiring novel applications for dynamic data  
51 visualization and sharing. Many browsers have been built to visualize GWAS outputs (e.g.,  
52 Khramtsova and Stranger 2017; Cuellar-Partida, Renteria, and MacGregor 2015; Juliusdottir et  
53 al. 2018; Ziegler, Hartsock, and Baxter 2015). However, none of these are specifically tailored  
54 for longitudinal traits. Further, existing applications do not offer features for the dynamic  
55 visualization of Manhattan plots online and for comparisons across timepoints simultaneously.

56 To address these limitations, we have developed a Shiny-based application, ShinyAIM, for  
57 visualizing and interpreting longitudinal GWAS outputs in an interactive way. The application is  
58 distinct from previously developed GWAS visualization browsers because it is specifically  
59 designed for longitudinal traits, allowing the simultaneous visualization of all time points or  
60 phenotypes and comparisons of top associated markers across time points. The interactive and  
61 integrative GWAS and phenotypic data visualization features embedded in the application offer a  
62 new resource for users to readily extract extensive information from temporal GWAS results.

## 63 **Overview of ShinyAIM**

### 64 **Methods**

65 ShinyAIM is entirely written in the R language (R Core Team 2018) with the underlying R code  
66 encapsulated by the shiny R package (Chang et al. 2018), which is a web application framework  
67 for R, offering an interactive graphical user interface. Shiny has been making inroads into plant  
68 breeding and quantitative genetics for research and teaching purposes, such as Be-Breeder  
69 (Fritsche-Neto and Matias, 2016) and ShinyGPAS (Morota 2017). ShinyAIM leverages the  
70 cumulative utility of the R packages manhattanly (Sahir 2016), plotly (Sievert et al. 2017) and  
71 ggplot2 (Wickham 2016) to create a cohesive web browser-based application. The ShinyAIM  
72 application does not require any working knowledge of R and is intuitively operated through  
73 graphical user interface. ShinyAIM is hosted by a Shiny web server  
74 (<https://chikudaisei.shinyapps.io/shinyaim/>) for online use or can be run locally within RStudio  
75 by running the code `shiny::runGitHub("ShinyAIM", "whussain2")`. Alternatively, the ShinyAIM  
76 source code and sample files can be directly downloaded from the GitHub repository  
77 (<https://github.com/whussain2/ShinyAIM>). From the downloaded directory, the source file  
78 named app.R in RStudio can be run by clicking the *Run App* button. The ShinyAIM application  
79 is open source and is distributed under Artistic License 2.0.

### 80 **Usage**

81 The starting page of the ShinyAIM application includes the Information tab with detailed  
82 information on how to format and upload the data. The video demonstration illustrating the  
83 application usage is also available (<https://youtu.be/5-JLMpSiwv4>). The ShinyAIM is aimed for  
84 visualization of GWAS outputs and does not perform GWAS analysis. There are five required  
85 columns in the user data file labeled as 'timepoint' (time point), 'marker' (marker name),  
86 'chrom' (chromosome number), 'pos' (marker position), and 'P' (marker p-value) for Manhattan  
87 plot visualizations. For phenotypic data visualization, the data file must have two columns  
88 including 'timepoint' (time point), and 'Value' (phenotypic value). Further detailed instructions  
89 regarding the data formatting and column naming can be found in the main Information tab. In  
90 addition, the sample data files can be directly downloaded by clicking the 'Download Sample  
91 File' button given on the top of sidebar panel in the main tab.

92           The ShinyAIM application hosted on the server can handle 200-300k markers for the  
93 visualization of interactive Manhattan plots. However, we suggest to launch the application  
94 locally by running the code `shiny::runGitHub("ShinyAIM", "whussain2")` in RStudio for the  
95 datasets with millions of markers. Alternatively, filtering can be done based on p-values by  
96 removing markers with large p-values prior to uploading the input file for visualization.

### 97 **Main features and functionality**

98           The application has four main features to explore GWAS results: (i) interactive Manhattan plots  
99 for single time points, (ii) Manhattan grid plot to compare results across all time points  
100 simultaneously, (iii) dynamic views of p-value filtered top associated markers in a scatter plot to  
101 identify co-localized markers over time, and (iv) visualization of phenotypic data used for  
102 GWAS (Figure 1). These features are supported by user-defined data filtering criteria in  
103 ShinyAIM to smoothly navigate the application. Each feature is briefly described in the  
104 following sections.

### 105 **Interactive Manhattan Plots**

106           In the Interactive Manhattan Plots panel, users can interactively view the Manhattan plot for each  
107 time point (Figure 1A). After the correct file format is selected and the file is uploaded, the  
108 available time points will be automatically updated in the ‘Choose Time Point or Phenotypes’  
109 menu. An interactive Manhattan plot is automatically generated on the right-hand panel after  
110 selecting a target time point. Users can move the mouse over the points in the plot to display  
111 detailed information, including the marker name, position, chromosome location, and  $-\log_{10}$  p-  
112 value. Furthermore, it is possible to zoom in on potential candidate regions to obtain additional  
113 detail. ShinyAIM offers the flexibility to choose the significance level by moving the slider input  
114 bar. In addition, users have a choice to display a list of markers arranged in decreasing order of  
115 p-values in the table below the Manhattan plot panel. The display also includes marker  
116 information in the input data file. The slider input bar controls the number of markers shown in  
117 the table.

### 118 **Manhattan Grid Plot**

119           Manhattan Grid Plot tab allows users to visualize the Manhattan plots combined for all time  
120 points and can be used to explore how GWAS peaks change over time to facilitate data

121 interpretation (Figure 1B). The significance threshold for markers can be modified by moving  
122 the slider input bar. Moreover, ShinyAIM enables users to choose the number of columns and  
123 rows in the grid plot by moving the slider input bar ‘Select the Number of Columns in Grid Plot.’

#### 124 **Comparison of Associated Markers**

125 Users are able to dynamically view only the top associated markers in a scatter plot (Figure 1C).  
126 This feature is implemented in ShinyAIM to enable users to focus only on the topmost associated  
127 markers and compare these markers across time points to identify co-localized regions. Users can  
128 select the number of markers displayed in a scatter plot by filtering the markers based on p-  
129 values. This is achieved by directly typing or selecting the option ‘Select Top Markers Based on  
130 p-value.’ The scatter plot is interactive, and users can move the mouse over a point to display  
131 information, including the time point, chromosome name, position of the marker, name of the  
132 marker, and  $-\log_{10}$  p-value (Figure 1C).

#### 133 **Phenotypic Data Visualization**

134 Phenotypic data visualization helps users view phenotypes used for GWAS in the form of  
135 dynamic histograms and density plots (Figure 1D). The trends and variability in phenotypic  
136 values at each time point can be visualized using box plots. All plot types are interactive, and  
137 users can move the mouse over a particular point to obtain detailed information.

#### 138 **Conclusion**

139 We have developed a user-friendly integrative Shiny-based application to dynamically visualize  
140 and interpret longitudinal GWAS results, providing an easy-to-use online tool to the community.

#### 141 **Availability**

142 The source code for the ShinyAIM application is freely available at the GitHub repository  
143 <https://github.com/whussain2/ShinyAIM> or at the Zenodo repository  
144 <https://zenodo.org/record/1422835>. The source code is licensed under Artistic License 2.0.  
145 ShinyAIM can be launched on any system that has RStudio installed or available online at the  
146 Shiny web server <https://chikudaisei.shinyapps.io/shinyaim/>

147

148

## 149 Figures

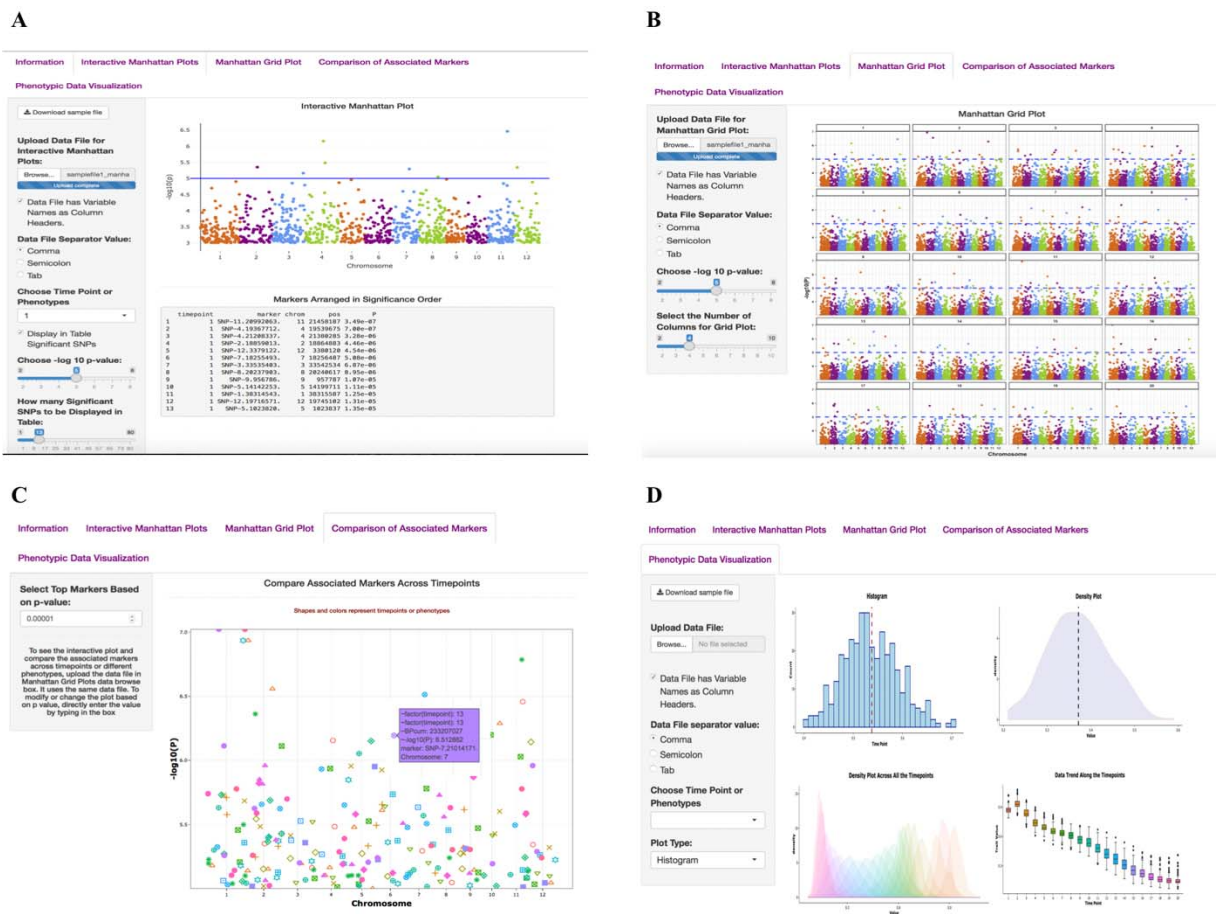

150  
151 **Figure 1:** Main interface of the ShinyAIM application. Screenshots of panels for the main tabs  
152 are shown. (A) The ‘Interactive Manhattan Plots’ tab allows users to display interactive  
153 Manhattan plots for a selected time point. Users have the flexibility to choose the significance  
154 level and can display the top associated markers in tabular format. (B) The ‘Manhattan Grid Plot’  
155 tab allows users to visualize Manhattan plots for all time points simultaneously. Users have the  
156 flexibility to choose the significance level and the number of columns in the grid plot. (C) The  
157 ‘Comparison of Associated Markers’ tab allows users to filter markers based on p-values, display  
158 a scatter plot for comparisons across all time points, and search for co-localized markers. (D)  
159 The ‘Phenotypic Data Visualization’ tab generates histogram and density plots and summarizes  
160 trends in temporal phenotypic data in the form of box plots.

161 **Acknowledgments**

162 This work was funded and supported by National Science Foundation Grant No.1736192.

163 **Conflict of interest**

164 The authors declare there are no competing interests.

165 **References**

166 Araus, J. L., & Kefauver, S. C. (2018). Breeding to adapt agriculture to climate change:

167 Affordable phenotyping solutions. *Current Opinion in Plant Biology* (In Press).

168 <https://doi.org/10.1016/j.pbi.2018.05.003>

169 Araus, J.L., Kefauver, S. C., Zaman-Allah, M., Olsen, M. S., & Cairns, J. E. (2018). Translating  
170 high-throughput phenotyping into genetic gain. *Trends in Plant Science*, 23(5), 451–466.

171 <https://doi.org/10.1016/j.tplants.2018.02.001>.

172 Bac-Molenaar, J. A., Vreugdenhil, D., Granier, C., & Keurentjes, J. J. B. (2015). Genome-wide  
173 association mapping of growth dynamics detects time-specific and general quantitative trait loci.

174 *Journal of Experimental Botany*, 66(18), 5567-5580. <http://dx.doi.org/10.1093/jxb/erv176>

175 Bhatnagar, S. (2016). Manhattanly: Interactive Q-Q and Manhattan Plots Using “Plotly.Js.”

176 <https://CRAN.R-project.org/package=manhattanly>.

177 Busemeyer, L., Ruckelshausen, A., Möller, K., Melchinger, A. E., Alheit, K. V., Maurer, H. P.,

178 Hahn, V., Weissmann, E. A., Reif, J. C., & Wu□rschum, T. (2013). Precision phenotyping of  
179 biomass accumulation in triticale reveals temporal genetic patterns of regulation. *Scientific*

180 *Reports*, 3, 2442. <https://www.nature.com/articles/srep02442>

181 Campbell, M. T., Walia, H., & Morota, G. (2018). Utilizing random regression models for

182 genomic prediction of a longitudinal trait derived from high-throughput phenotyping. *BioRxiv*

183 319897 [Preprint]. <https://doi.org/10.1101/319897>

184 Chang, Winston., Cheng, J., & Allaire, et al. (2018) Shiny: Web application framework for R.

185 <https://CRAN.R-project.org/package=shiny>.

186



187 Cuellar-Partida, G., Renteria, M. E., & MacGregor, S. (2015). LocusTrack: Integrated  
188 Visualization of GWAS Results and Genomic Annotation. *Source Code for Biology and*  
189 *Medicine*, 10, 1. <https://doi.org/10.1186/s13029-015-0032-8>

190 Fritsche-Neto, Roberto., & Matias, F. I. (2016). Be-Breeder - Learning: A new tool for teaching  
191 and learning plant breeding principles. *Crop Breeding and Applied Biotechnology*, 16(3), 240–  
192 245. <http://dx.doi.org/10.1590/1984-70332016v16n3n36>.

193 Wickham, H. (2016). *ggplot2: Elegant Graphics for Data Analysis*. Springer-Verlag New York.  
194 ISBN 978-3-319-24277-4. <http://ggplot2.org>.

195 Juliusdottir, T., Banasik, K., Robertson, N. R., Mott, R., & McCarthy, M. I. (2018). Toppar: An  
196 Interactive Browser for Viewing Association Study Results. *Bioinformatics*, 34(11), 1922–1924.  
197 <https://doi.org/10.1093/bioinformatics/btx840>

198 Khrantsova, E. A., & Stranger, B. E. (2017). Assocplots: A Python package for static and  
199 interactive visualization of multiple-group GWAS results. *Bioinformatics*, 33(3), 432–434.  
200 <https://doi.org/10.1093/bioinformatics/btw641>

201 Moore, C. R., Johnson, L. S., Kwak, I. Y., Livny, M., Broman, K. W., & Spalding, E. P.  
202 (2013). High-throughput computer vision introduces the time axis to a  
203 quantitative trait map of a plant growth response. *Genetics*, 195, 1077–  
204 1086. <https://doi.org/10.1534/genetics.113.153346>

205 Morota, G. (2017). ShinyGPAS: Interactive Genomic Prediction Accuracy Simulator based on  
206 deterministic formulas. *Genetics, Selection, Evolution* 49: 91. [https://doi.org/10.1186/s12711-](https://doi.org/10.1186/s12711-017-0368-4)  
207 [017-0368-4](https://doi.org/10.1186/s12711-017-0368-4)

208 R Core Team. (2018). R: The R Project for Statistical Computing. Vienna, Austria.  
209 <https://www.r-project.org/>.

210 Sievert, C., Parmer, C., Hocking, et al. (2017). Plotly: Create Interactive Web Graphics via  
211 “Plotly.Js.” <https://CRAN.R-project.org/package=plotly>

212 Slovak, R., Göschl, C., Su, X., Shimotani, K., Shiina, T., & Busch, W. (2014). A  
213 scalable open-source pipeline for large-scale root phenotyping of Arabidopsis.

- 214 *Plant Cell*, 26, 2390–2403. <https://doi.org/10.1105/tpc.114.124032>
- 215 Topp, C. N., Iyer-Pascuzzi, A. S., Anderson, J. T., Lee, C. R., Zurek, P. R., Symonova, O.,  
216 Zheng, Y., Bucksch, A., Mileyko, Y., Galkovskyi, T., et al. (2013). 3D phenotyping and  
217 quantitative trait locus mapping identify core regions of the rice genome controlling root  
218 architecture. *Proceedings of National Academy of Science USA*, 110: E1695–E1704.  
219 <https://doi.org/10.1073/pnas.1304354110>
- 220 Wu□rschum, T., Liu, W., Busemeyer, L., Tucker, M. R., Reif, J.C., Weissmann, E. A., Hahn,  
221 V., Ruckelshausen, A., & Maurer, H. P. (2014). Mapping dynamic QTL for plant height in  
222 triticale. *BMC Genetics*, 15, 59. <https://doi.org/10.1186/1471-2156-15-59>
- 223 Yang, W., Guo, Z., Huang, C., Duan, L., Chen, G., Jiang, N., Fang, W., Feng, H., Xie, W., Lian,  
224 X., et al. (2014). Combining high-throughput phenotyping and genome-wide association studies  
225 to reveal natural genetic variation in rice. *Nature Communications*, 5, 5087.  
226 <https://www.nature.com/articles/ncomms6087>
- 227 Ziegler, G. R., Ryan, H. H., & Baxter, I. (2015). Zbrowse: An interactive GWAS results  
228 browser. *PeerJ Computer Science* 1, e3. <https://peerj.com/articles/cs-3/>
